# Supplementary material for: Discovery of single nucleotide polymorphisms in candidate genes associated with fertility and production traits in Holstein cattle
Source: PubMed Central journal article supplement (PMC3686577; doi:10.1186/1471-2156-14-49), 2013-06-07
Supplement: 1471-2156-14-49-S1.pdf [file 1471-2156-14-49-S1.pdf]

Table S1. Predicted transmitting ability for selected traits of bulls used for genotyping.

| Trait                   | Mean  | Standard error | Minimum  | Maximum |
|-------------------------|-------|----------------|----------|---------|
| Daughter pregnancy rate | -0.17 | 3.25           | -5.90    | 5.30    |
| Heifer conception rate  | 0.15  | 1.78           | -6.40    | 5.80    |
| Cow conception rate     | -0.31 | 4.13           | -8.50    | 8.20    |
| Productive life         | 0.43  | 3.91           | -7.70    | 9.90    |
| Net merit               | 47.49 | 347.58         | -948.00  | 867.00  |
| Milk yield              | 13.78 | 1036.00        | -4386.00 | 2571.00 |
| Fat yield               | 6.23  | 36.55          | -139.00  | 107.00  |
| Percent fat             | 0.02  | 0.11           | -0.26    | 0.50    |
| Protein yield           | 2.67  | 29.55          | -121.00  | 62.00   |
| Percent protein         | 0.01  | 0.05           | -0.12    | 0.18    |
| Somatic cell score      | 2.95  | 0.22           | 2.41     | 3.68    |

Table S2. Source of genes included in SNP array.

| Source                                                                                                                                   | Genes used for SNP analysis                                                                                                                                                                                                                                                                                                                                                                                                | Reference                                     |
|------------------------------------------------------------------------------------------------------------------------------------------|----------------------------------------------------------------------------------------------------------------------------------------------------------------------------------------------------------------------------------------------------------------------------------------------------------------------------------------------------------------------------------------------------------------------------|-----------------------------------------------|
| Genes with SNPs previously linked to reproduction                                                                                        | <i>CAST, FGF2, FSHR, GHR, HSPA1A, LEP, ITGB5, NLRP9, PAPP2, PGR, STAT5A, SERPINA14</i>                                                                                                                                                                                                                                                                                                                                     | 11, 12, 14, 15,17, 18, 19, 21, 22, 23, 24, 49 |
| Genes physically close to SNPs related to interval to insemination                                                                       | <i>IGFBP7, IRF9, PARP12</i>                                                                                                                                                                                                                                                                                                                                                                                                | 28                                            |
| Genes physically close to 56 d non-return rate                                                                                           | <i>BAIAP2, SCRNI</i>                                                                                                                                                                                                                                                                                                                                                                                                       | 28                                            |
| Genes differentially regulated in the brain of animals displaying strong vs. weak estrus                                                 | <i>A2ML1, ATP1A2, BNIP2, CACNA1D, CALCR, CCDC137, CCDC88B, CHRNA5, CLDN11, DOK2, DLGAP1, DNAH11, ENPP2, FAM5C, FBP2, FILIP1, FXC1, GNA12, GNA15, HEPACAM, HIGD1B, HTR2A, LAT, LRRC8D, MAPK8IP3, MCHRI, MCOLN3, MOCOS, MOCSI, NKD1, PDIA5, PLP2, PLXNC1, POMC, PRKCQ, RHBDF1, RRP7A, SNX1, SNX27, SNX7, SPARCL1, SPTBN4, SYTL2, THBD THBS1, TRPV3, TSC22D2, TSPAN15, TSPYLI, TTF1, VAT1L,</i>                               | 25                                            |
| Embryo genes upregulated after cryopreservation                                                                                          | <i>DSC2</i>                                                                                                                                                                                                                                                                                                                                                                                                                | 29                                            |
| Genes differentially regulated in superovulated embryos compared to embryos from unstimulated dams                                       | <i>CLGN, GOLGA4, HNRNPUL1, HSPA14, JARID2, KIT, FUT1, MYO1D</i>                                                                                                                                                                                                                                                                                                                                                            | 30                                            |
| Genes differentially regulated in embryos which survived to term compared to embryos that died <i>in vivo</i>                            | <i>ACAT2, AP2B1, ATP5A1, CCT2, CCT8, DHRS12, DTX2, GART, GDEI, GPX4, HNRPA1, HSPA8, KIF20A, KPNA4, MS4A8B, NDUFS4, OCLN, PRSS23, RIOK3, RPL7A, RPL8, TAGLN2, WDR13, WDR26, ZNF207, ZNF638</i>                                                                                                                                                                                                                              | 27, 31                                        |
| Genes differentially regulated in oocytes compared to 8 cell embryos                                                                     | <i>CD14, CD97, CLIC4, COPZ1, CTNNB1, GTF2F1, IL1A, MAOA, NEU3, NR2F2, PISD, POLD2, PTGFR, TXN2, TXNL4B, UQCRC2, ZDHHC16</i>                                                                                                                                                                                                                                                                                                | 35                                            |
| Genes differentially regulated in oocytes compared to blastocysts                                                                        | <i>CLIC1, GJA1, GRB10, HMGB2, HPRT, NUP160, TAF9,</i>                                                                                                                                                                                                                                                                                                                                                                      | 36                                            |
| Genes differentially regulated embryos treated with CSF2 compared to control embryos                                                     | <i>ATP10D, BRD3, CACNA1G, CCRL1, CD2, CCDC86, CELSR2, CENPI, CHURC1, C17H22orf25, DTX3, DZIP3, ECE1, ECE2, F5, FGD3, FHL1, FYB, GREM1, HOXA5, HUWE1, IBSP, IMPDH1, LANCL2, LEMD2, MASP2, MASTL, MPP2, MRPS12, NT5E, PCDH24, PHGDH, PLAC8L1, PLD2, PMM2, POLL, PPP1R3F, PPP2R3A, PTPRK, RALGPS1, ROR2, RTN4, SFRP4, SNX29, STUB1, SULT2A1, TBC1D24, THBS3, THYN1, TMEM17, TMEM98, TNFSF8, TTLL3, ZNF135, ZNF180, ZNF521</i> | 32                                            |
| Genes differentially regulated in embryos treated with IGF1 compared to control embryos                                                  | <i>ARHGEF10L, ATP9B, C5H12orf11, COL4A1, COQ9, CPSF3, CREG1, CYP4F2, DEPDC7, DPYSL4, DYRK3, FADS6, GCNT3, GPR173, H1FOO, IMMT, IPP, MMP13, MMP15, MON1B, MST1, NEURL, OSBPL1, PGCP, RNASEL, SLC40A1, TDRKH, TRAM2</i>                                                                                                                                                                                                      | 33                                            |
| Genes differentially regulated in embryos cultured <i>in vitro</i> in the well of the well system compared to embryos cultured in groups | <i>ACOT8, ACTB, ALOX15, ATP2B3, BUB3, CFDP2, CSNK1E, GDPD5, MNS1, MTERFD1, NUSAP1, RGS16, TKDP1, UHRF1, ZP4</i>                                                                                                                                                                                                                                                                                                            | 34                                            |
| Endometrial genes related to embryo survival                                                                                             | <i>AGPAT4, DGKA, BSP3</i>                                                                                                                                                                                                                                                                                                                                                                                                  | 26                                            |

Table S2 (continued).

| Source                                                                                                          | Genes used for SNP analysis                                                                                                                                                                                                                                                                                                                                                                                                                                                                                                                                            | Reference                                        |
|-----------------------------------------------------------------------------------------------------------------|------------------------------------------------------------------------------------------------------------------------------------------------------------------------------------------------------------------------------------------------------------------------------------------------------------------------------------------------------------------------------------------------------------------------------------------------------------------------------------------------------------------------------------------------------------------------|--------------------------------------------------|
| Endometrial genes differentially regulated in lactating cows compared to non-lactating cows                     | <i>ABCD1, ANGPTL4, AP3D1, APBB1, AQP4, ARIH1, ARL6IP1, ATP2A2, BAG3, BCAS1, BREH1, C23H6orf145, C7H19orf60, CA5B, CCDC124, CGREF1, CHCHD6, CNN1, COMMD5, COMTD1, COPS6, CSPP1, EGFL8, EIF2AK3, EIF2C2, EIF2C3, ELAC1, FAM33A, FXR1, GALT, GRASP, HAX1, HEYL, HIPK1, HIVP1, HMCN1, HSDL2, ICA1, KCNN2, KDR, KLK1, LPIN3, MACF1, MARVELD1, MCM5, MCPH1, MDH1B, MGC143117, MRGPRF, MRPL48, MST4, NAP1L5, NDUFB10, NFKBIL1, ODF2, PAPOLG, PDK4, PDLIM4, PEMT, PEX11G, RABEP2, RAGE, SEC14L1, SLC1A5, SLC39A13, SSFA2, STI3, TALDO1, TMBIM4, TNMD, UBE2D3P, WBPI, ZNF45</i> | 38                                               |
| Endometrial genes differentially regulated in pregnant cows compared to non-pregnant cows                       | <i>ABCC3, ABHD2, ABLIM3, ADFP, AHCYL2, AIFM1, ALG14, ANXA1, ARHGAP15, ASL, ATL3, BCL2L1, BCL2L15, BOLA-DMB, C10H14orf10, C1QB, C2, C28H10orf10, CARS2, CBX6, CCDC80, CD40, CD59, CDH13, CFB, CNP, COL11A1, COL18A1, CRYM, DAXX, PARM1, DNASE2, DPP3, DRAM, EIF2AK2, ENPP3, EPAS1, EVI2B, FABP3, FAP, FBLN5, FCER1G, GALNTL1, GBP4, GBP5, GPLD1, GRIK1, GTF2IRD, PLET1</i>                                                                                                                                                                                              | 38                                               |
| Genes in cumulus cells regulated by the LH surge                                                                | <i>DHCR24, ERRF11, HAS2, SLC18A2</i>                                                                                                                                                                                                                                                                                                                                                                                                                                                                                                                                   | 39                                               |
| Cumulus genes differentially regulated at different stages of oocyte maturation                                 | <i>AP3B1, CAPN10, CLU, CSDE1, ETF1, LDB3, LDLR, PDAI3, PLA2G1B, PPIB, RPS5</i>                                                                                                                                                                                                                                                                                                                                                                                                                                                                                         | 40                                               |
| Genes differentially regulated in dominant follicles compared to subordinate follicles                          | <i>APBB1IP, VCAN, CYP19A1, DDX6, FAM65B, FST, MAP3K5, SERPINE2, WDR77</i>                                                                                                                                                                                                                                                                                                                                                                                                                                                                                              | 42-45                                            |
| Genes differentially regulated in cumulus cells from <i>in vivo</i> embryos compared to <i>in vitro</i> embryos | <i>LPL, MAGED1</i>                                                                                                                                                                                                                                                                                                                                                                                                                                                                                                                                                     | 41                                               |
| Liver genes differentially regulated during the transition period                                               | <i>ACLY, ACSL1, BDH2, CPT2, GPD2, NRIH3, PC, PCCA, PCCB, PPARA, SREBF1</i>                                                                                                                                                                                                                                                                                                                                                                                                                                                                                             | 46                                               |
| Mammary genes differentially regulated during lactation                                                         | <i>ABCA1</i>                                                                                                                                                                                                                                                                                                                                                                                                                                                                                                                                                           | 47                                               |
| Oocyte genes differentially regulated at different stages of oocyte maturation                                  | <i>CPSF1, HSF1, PAPOLA, ZP2</i>                                                                                                                                                                                                                                                                                                                                                                                                                                                                                                                                        | 37                                               |
| Genes differentially regulated in oviduct of cows at diestrus compared to estrus                                | <i>C3, EDEM, NARG2, OVGPI, REPS1, RPL26, SLC35B1, SNX9</i>                                                                                                                                                                                                                                                                                                                                                                                                                                                                                                             | 48                                               |
| Other genes of interest                                                                                         | <i>ADRB3, AVP, AVPR1B, BCL2, BMP15, CSF2, FGFR1, FGFR3, FGFR4, GDF9, GH1, HCRT, HCRTR2, HSD17B6, HSD17B10, HSD17B12, HSD17B14, HSD17B3, HSD17B7, HSPA9, IFNT2, IGF2R, INHA, INS, LEPR, LHCGR, LIF, NPY2R, POU5F1, PRLR, SPP1, TSHB</i>                                                                                                                                                                                                                                                                                                                                 | Chosen for well-established role in reproduction |

Table S3. Full list of SNPs used in array.<sup>ab</sup>

| SNP         | Gene symbol      | Type | SNP         | Gene symbol        | Type | SNP         | Gene symbol          | Type |
|-------------|------------------|------|-------------|--------------------|------|-------------|----------------------|------|
| rs136237997 | <i>A2ML1</i>     | F    | rs135769862 | <i>C10H14orf37</i> | M    | rs135150607 | <i>COPZ1</i>         | M    |
| rs134363828 | <i>ABCA1</i>     | M    | rs41749178  | <i>C15H11ORF34</i> | M    | rs109301586 | <i>COQ9</i>          | M    |
| rs41909830  | <i>ABCC3</i>     | M    | rs135390325 | <i>C1QB</i>        | M    | rs134432442 | <i>CPSF</i>          | M    |
| rs133760069 | <i>ABCD1</i>     | M    | rs136246323 | <i>C2</i>          | M    | rs43689571  | <i>CPSF3</i>         | M    |
| rs133886423 | <i>ABHD2</i>     | M    | rs133455683 | <i>C22orf25</i>    | M    | rs110644120 | <i>CPT2</i>          | M    |
| rs43521241  | <i>ABLIM3</i>    | M    | rs132686349 | <i>C23H6orf145</i> | M    | rs136509175 | <i>CREG1</i>         | M    |
| rs109967779 | <i>ACAT2</i>     | M    | rs134150850 | <i>C28H10ORF10</i> | M    | rs135388644 | <i>CRYM</i>          | M    |
| rs134226536 | <i>ACLY</i>      | M    | rs137306001 | <i>C3</i>          | M    | rs137419143 | <i>CSDE1</i>         | M    |
| rs132631661 | <i>ACOT8</i>     | M    | rs134731843 | <i>C5H12orf11</i>  | M    | rs134570201 | <i>CSF2</i>          | M    |
| rs133807533 | <i>ACSL1</i>     | M    | rs109332658 | <i>C7H19orf60</i>  | M    | rs133449166 | <i>CSNK1E</i>        | M    |
| rs109328897 | <i>ACTB</i>      | M    | rs134920430 | <i>CA5B</i>        | F    | rs137248155 | <i>CSPG2</i>         | M    |
| rs136470751 | <i>ADFP</i>      | M    | rs135744058 | <i>CACNA1D</i>     | M    | rs109443582 | <i>CSPPI</i>         | M    |
| rs134342155 | <i>ADRB3</i>     | M    | rs135633806 | <i>CACNA1G</i>     | M    | rs135969377 | <i>CTNBNBL1</i>      | M    |
| rs134151532 | <i>AGPAT4</i>    | F    | rs42940189  | <i>CALCR</i>       | M    | rs72552260  | <i>CYP19A1</i>       | N    |
| rs41599809  | <i>AHCYL2</i>    | M    | rs135946207 | <i>CAPN10</i>      | M    | rs135537165 | <i>CYP4F2</i>        | M    |
| rs137266161 | <i>AIFM1</i>     | M    | rs133633034 | <i>CARS2</i>       | M    | rs136421630 | <i>DAXX</i>          | M    |
| rs134553846 | <i>ALG14</i>     | M    | rs137601357 | <i>CAST</i>        | M    | rs134436813 | <i>DDX6</i>          | M    |
| rs135335430 | <i>ALOX15</i>    | M    | rs136677334 | <i>CBX6</i>        | M    | rs110270752 | <i>DEPDC7</i>        | M    |
| rs133045346 | <i>ANGPTL4</i>   | M    | rs137496152 | <i>CCDC124</i>     | M    | rs43431357  | <i>DGKA</i>          | M    |
| rs133874793 | <i>ANXA1</i>     | M    | rs109405883 | <i>CCDC137</i>     | M    | rs43350963  | <i>DHCR24</i>        | M    |
| rs109258025 | <i>AP2B1</i>     | M    | rs135044672 | <i>CCDC80</i>      | M    | rs136114393 | <i>DHRS12</i>        | M    |
| rs133700190 | <i>AP3B1</i>     | M    | rs109447102 | <i>CCDC86</i>      | M    | rs111027720 | <i>DKFZP564O0823</i> | M    |
| rs109135734 | <i>AP3D1</i>     | M    | rs41652321  | <i>CCDC88B</i>     | M    | rs134091448 | <i>DLGAP1</i>        | M    |
| rs41766835  | <i>APBB1</i>     | M    | rs136780154 | <i>CCRL1</i>       | M    | rs110629231 | <i>DNAH11</i>        | M    |
| rs110220591 | <i>APBB1IP</i>   | M    | rs137824263 | <i>CCT2</i>        | N    | rs43498653  | <i>DNASE2</i>        | M    |
| rs137167347 | <i>AQP4</i>      | M    | rs137673698 | <i>CCT8</i>        | M    | rs109455239 | <i>DOK2</i>          | M    |
| rs135611444 | <i>ARHGAP15</i>  | N    | rs109621328 | <i>CD14</i>        | M    | rs136449785 | <i>DPP3</i>          | M    |
| rs110409773 | <i>ARHGEF10L</i> | M    | rs133747802 | <i>CD2</i>         | M    | rs137755291 | <i>DPYSL4</i>        | M    |
| rs132929646 | <i>ARIH1</i>     | M    | rs41711496  | <i>CD40</i>        | M    | rs42500325  | <i>DRAM</i>          | M    |
| rs110541595 | <i>ARL6IP1</i>   | N    | rs135772848 | <i>CD59</i>        | M    | rs109503725 | <i>DSC2</i>          | M    |
| rs110127056 | <i>ASL</i>       | M    | rs136773663 | <i>CD97</i>        | N    | rs42075611  | <i>DTX2</i>          | M    |
| rs132809107 | <i>ATL3</i>      | M    | rs135844880 | <i>CDH13</i>       | M    | rs42802714  | <i>DTX3</i>          | M    |
| rs136026021 | <i>ATP10D</i>    | M    | rs132778427 | <i>CELSR2</i>      | M    | rs109561866 | <i>DYRK3</i>         | M    |
| rs134914858 | <i>ATP1A2</i>    | M    | rs42659465  | <i>CENPI</i>       | M    | rs133175991 | <i>DZIP3</i>         | M    |
| rs135566160 | <i>ATP2A2</i>    | M    | rs110908357 | <i>CFB</i>         | M    | rs134627657 | <i>ECE1</i>          | M    |
| rs137598162 | <i>ATP2B3</i>    | M    | rs41857027  | <i>CFDP2</i>       | M    | rs43246430  | <i>ECE2</i>          | M    |
| rs110909003 | <i>ATP5A1</i>    | M    | rs136313735 | <i>CGREF1</i>      | M    | rs136063807 | <i>EDEM</i>          | F    |
| rs133943579 | <i>ATP9B</i>     | M    | rs42015101  | <i>CHCHD6</i>      | M    | rs133368470 | <i>EGFL8</i>         | M    |
| rs43114141  | <i>AVP</i>       | M    | rs133347185 | <i>CHRNA5</i>      | M    | rs134328637 | <i>EIF2AK2</i>       | M    |
| rs134002804 | <i>AVPR1B</i>    | M    | rs134702715 | <i>CHURC1</i>      | M    | rs132729335 | <i>EIF2AK3</i>       | M    |
| rs136509758 | <i>BAG3</i>      | M    | rs135468863 | <i>CLDN11</i>      | M    | rs134157159 | <i>EIF2C2</i>        | M    |
| rs111023026 | <i>BAIAP2</i>    | M    | rs136761255 | <i>CLGN</i>        | M    | rs133045474 | <i>EIF2C3</i>        | M    |
| rs109669573 | <i>BCAS1</i>     | M    | rs136412422 | <i>CLIC1</i>       | M    | rs42048798  | <i>ELAC1</i>         | M    |
| rs135348971 | <i>BCL2</i>      | M    | rs135662651 | <i>CLIC4</i>       | F    | rs41743834  | <i>ENPP2</i>         | M    |
| rs137820357 | <i>BCL2L1</i>    | M    | rs132831699 | <i>CLU</i>         | M    | rs135184987 | <i>ENPP3</i>         | M    |
| rs137705645 | <i>BCL2L15</i>   | M    | rs134527215 | <i>CNN1</i>        | M    | rs43676052  | <i>EPAS1</i>         | M    |
| rs133674837 | <i>BDH2</i>      | M    | rs135658705 | <i>CNP</i>         | M    | rs132928554 | <i>ERRF11</i>        | M    |
| rs81184812  | <i>BMP15</i>     | M    | rs42524413  | <i>COL11A1</i>     | M    | rs43518269  | <i>ETV1</i>          | M    |
| rs42556894  | <i>BNIP2</i>     | M    | rs136347771 | <i>COL18A1</i>     | M    | rs137607833 | <i>EVI2B</i>         | M    |
| rs109032590 | <i>BOLA-DMB</i>  | M    | rs109203188 | <i>COL4A1</i>      | M    | rs133157169 | <i>F5</i>            | F    |
| rs137512132 | <i>BRD3</i>      | M    | rs110745686 | <i>COMMD5</i>      | M    | rs109296407 | <i>FABP3</i>         | M    |
| rs133216336 | <i>BREH1</i>     | M    | rs135553308 | <i>COMTD1</i>      | F    | rs135036564 | <i>FADS6</i>         | M    |
| rs136142980 | <i>BUB3</i>      | M    | rs133636751 | <i>COPS6</i>       | M    | rs137620068 | <i>FAM33A</i>        | M    |

Table S3 (continued).<sup>ab</sup>

| SNP         | Gene symbol     | Type | SNP         | Gene symbol     | Type | SNP         | Gene symbol      | Type |
|-------------|-----------------|------|-------------|-----------------|------|-------------|------------------|------|
| rs135071345 | <i>FAM5C</i>    | M    | rs137637327 | <i>HIVEP1</i>   | M    | rs43362191  | <i>MACF1</i>     | M    |
| rs109828652 | <i>FAM65B</i>   | M    | rs41820800  | <i>HMCN1</i>    | M    | rs132883208 | <i>MAGED1</i>    | M    |
| rs41644070  | <i>FAP</i>      | M    | rs137106841 | <i>HMGB2</i>    | M    | rs134256715 | <i>MAOA</i>      | M    |
| rs136311048 | <i>FBLN5</i>    | M    | rs136846474 | <i>HNRNPUL1</i> | M    | rs35828944  | <i>MAP3K5</i>    | F    |
| rs137041504 | <i>FBP2</i>     | M    | rs134667792 | <i>HNRPA1</i>   | M    | rs133744546 | <i>MAPK8IP3</i>  | M    |
| rs109137982 | <i>FCER1G</i>   | M    | rs133324316 | <i>HOXA5</i>    | F    | rs134011564 | <i>MARVELD1</i>  | M    |
| rs136479492 | <i>FGD3</i>     | M    | rs111004439 | <i>HPRT</i>     | M    | rs135861024 | <i>MASP2</i>     | M    |
| FGF2ag      | <i>FGF2</i>     | I    | rs137159760 | <i>HSD17B10</i> | M    | rs135231416 | <i>MASTL</i>     | M    |
| rs136916726 | <i>FGF2</i>     | M    | rs109711583 | <i>HSD17B12</i> | M    | rs110032311 | <i>MCHR1</i>     | M    |
| rs135399289 | <i>FGFR1</i>    | M    | rs136102662 | <i>HSD17B14</i> | M    | rs110120925 | <i>MCM5</i>      | M    |
| rs135467439 | <i>FGFR3</i>    | M    | rs43079452  | <i>HSD17B3</i>  | M    | rs109745895 | <i>MCOLN3</i>    | M    |
| rs132906456 | <i>FGFR4</i>    | M    | rs109769865 | <i>HSD17B6</i>  | M    | rs133189515 | <i>MCPH1</i>     | M    |
| rs132951036 | <i>FHL1</i>     | M    | rs110828053 | <i>HSD17B7</i>  | M    | rs133974623 | <i>MDH1B</i>     | M    |
| rs133920062 | <i>FILIP1</i>   | M    | rs136004185 | <i>HSDL2</i>    | F    | rs134555355 | <i>MGC143117</i> | M    |
| rs43745234  | <i>FSHR</i>     | M    | rs135258919 | <i>HSF</i>      | M    | rs41893756  | <i>MGC152033</i> | M    |
| rs109247499 | <i>FST</i>      | M    | HSP70C895D  | <i>HSPA1A</i>   | P    | rs111015874 | <i>MMP13</i>     | M    |
| rs109417696 | <i>FXC1</i>     | M    | rs109582484 | <i>HSPA14</i>   | M    | rs109314167 | <i>MMP15</i>     | M    |
| rs135373537 | <i>FXR1</i>     | M    | rs135485189 | <i>HSPA8</i>    | M    | rs135686109 | <i>MNS1</i>      | M    |
| rs109262355 | <i>FYB</i>      | M    | rs134429278 | <i>HSPA9</i>    | M    | rs133930203 | <i>MOCOS</i>     | M    |
| rs137308622 | <i>GALNTL1</i>  | M    | rs137432044 | <i>HTR2A</i>    | M    | rs136684662 | <i>MOC51</i>     | M    |
| rs135558719 | <i>GALT</i>     | M    | rs134861564 | <i>HUWE1</i>    | M    | rs41859871  | <i>MON1B</i>     | M    |
| rs133161316 | <i>GART</i>     | M    | rs110789098 | <i>IBSP</i>     | M    | rs136665691 | <i>MPP2</i>      | M    |
| rs136339580 | <i>GBP4</i>     | M    | rs135022753 | <i>ICAI</i>     | M    | rs109248655 | <i>MRGPRF</i>    | M    |
| rs136297934 | <i>GBP5</i>     | M    | rs133621844 | <i>IFNT</i>     | M    | rs43703916  | <i>MRPL48</i>    | M    |
| rs109830880 | <i>GCNT3</i>    | M    | rs134815699 | <i>IGF2R</i>    | M    | rs135290352 | <i>MRPS12</i>    | M    |
| rs133381146 | <i>GDE1</i>     | M    | rs43477921  | <i>IGFBP7</i>   | M    | rs109761676 | <i>MS4A8B</i>    | M    |
| rs110553528 | <i>GDF9</i>     | M    | rs135971907 | <i>ILIA</i>     | M    | rs109866722 | <i>MST1</i>      | M    |
| rs133081463 | <i>GDPD5</i>    | M    | rs135674052 | <i>IMMT</i>     | M    | rs135493649 | <i>MST4</i>      | F    |
| rs134687399 | <i>GH1</i>      | M    | rs109755950 | <i>IMPDH1</i>   | M    | rs134254857 | <i>MTERFD1</i>   | M    |
| rs109212162 | <i>GHR</i>      | M    | rs43322178  | <i>INHA</i>     | M    | rs42592965  | <i>MYO1D</i>     | M    |
| rs136325310 | <i>GJA1</i>     | M    | rs109229312 | <i>INS</i>      | M    | rs109383758 | <i>NALP9</i>     | M    |
| rs132685523 | <i>GNA12</i>    | M    | rs133441883 | <i>IPP</i>      | M    | rs133855844 | <i>NAP1L5</i>    | M    |
| rs134740563 | <i>GNA15</i>    | M    | rs110953315 | <i>IRF9</i>     | M    | rs43632414  | <i>NARG2</i>     | M    |
| rs42339105  | <i>GOLGA4</i>   | M    | rs137747481 | <i>ITGB5</i>    | M    | rs109162730 | <i>NDUFB10</i>   | M    |
| rs134191500 | <i>GPD2</i>     | M    | rs136141098 | <i>JARID2</i>   | M    | rs136596433 | <i>NDUFS4</i>    | M    |
| rs109516714 | <i>GPLD1</i>    | M    | rs135848069 | <i>KCNN2</i>    | M    | rs133762601 | <i>NEU3</i>      | M    |
| rs137471680 | <i>GPR173</i>   | M    | rs110675167 | <i>KDR</i>      | M    | rs135719210 | <i>NEURL</i>     | M    |
| rs133501979 | <i>GPX4</i>     | M    | rs137783797 | <i>KIF20A</i>   | M    | rs133497176 | <i>NFKBIL1</i>   | M    |
| rs136675254 | <i>GRASP</i>    | M    | rs109770509 | <i>KIT</i>      | M    | rs133303839 | <i>NKD1</i>      | M    |
| rs109131402 | <i>GRB10</i>    | M    | rs136160116 | <i>KLK1</i>     | M    | rs136245753 | <i>NPY2R</i>     | M    |
| rs134515406 | <i>GREM1</i>    | M    | rs133611510 | <i>KPNA4</i>    | M    | rs41780084  | <i>NR1H3</i>     | N    |
| rs42677586  | <i>GRIK1</i>    | M    | rs135980601 | <i>LANCL2</i>   | M    | rs137384129 | <i>NR2F2</i>     | M    |
| rs136907804 | <i>GTF2F1</i>   | F    | rs133552701 | <i>LAT</i>      | M    | rs42508588  | <i>NT5E</i>      | M    |
| rs137543809 | <i>GTF2IRD1</i> | M    | rs111015912 | <i>LDB3</i>     | M    | rs136067760 | <i>NUP160</i>    | F    |
| rs43565520  | <i>H1FOO</i>    | M    | rs137254593 | <i>LDLR</i>     | M    | rs133025321 | <i>NUSAP1</i>    | M    |
| rs137419895 | <i>HAS2</i>     | M    | rs109640782 | <i>LEMD2</i>    | M    | rs134264563 | <i>OCLN</i>      | M    |
| rs110733329 | <i>HAX1</i>     | M    | rs29004487  | <i>LEP</i>      | M    | rs109118553 | <i>ODF2</i>      | M    |
| rs137237970 | <i>HCRT</i>     | M    | rs109178802 | <i>LEPR</i>     | N    | rs134635807 | <i>OSBPL11</i>   | M    |
| rs135832477 | <i>HCRTR2</i>   | M    | rs41256848  | <i>LHCGR</i>    | M    | rs110568464 | <i>OVGP1</i>     | M    |
| rs136372325 | <i>HEPACAM</i>  | M    | rs133270360 | <i>LIF</i>      | M    | rs137633593 | <i>PAPOLA</i>    | M    |
| rs135822443 | <i>HEYL</i>     | M    | rs135714188 | <i>LPIN3</i>    | M    | rs134114239 | <i>PAPOLG</i>    | M    |
| rs136118679 | <i>HIGD1B</i>   | M    | rs133043641 | <i>LPL</i>      | M    | rs42301978  | <i>PAPPA2</i>    | I    |
| rs132644376 | <i>HIPK1</i>    | M    | rs133530005 | <i>LRRC8D</i>   | M    | rs137606191 | <i>PARP12</i>    | M    |

Table S3 (continued).<sup>ab</sup>

| SNP         | Gene symbol    | Type | SNP         | Gene symbol     | Type | SNP         | Gene symbol    | Type |
|-------------|----------------|------|-------------|-----------------|------|-------------|----------------|------|
| rs137233944 | <i>PC</i>      | M    | rs109899155 | <i>RIOK3</i>    | M    | rs133088824 | <i>THBD</i>    | M    |
| rs135481809 | <i>PCCA</i>    | M    | rs133308936 | <i>RNASEL</i>   | M    | rs34755712  | <i>THBS1</i>   | F    |
| rs109813896 | <i>PCCB</i>    | M    | rs43572154  | <i>ROR2</i>     | M    | rs43334659  | <i>THBS3</i>   | M    |
| rs137801136 | <i>PCDH24</i>  | M    | rs136457441 | <i>RPL26</i>    | M    | rs134923946 | <i>THYNI</i>   | M    |
| rs136315768 | <i>PDAI3</i>   | M    | rs109154196 | <i>RPL7A</i>    | M    | rs110506989 | <i>TKDP1</i>   | M    |
| rs134930259 | <i>PDIA5</i>   | M    | rs110729074 | <i>RPL8</i>     | M    | rs133648944 | <i>TMBIM4</i>  | M    |
| rs136831664 | <i>PDK4</i>    | F    | rs134055596 | <i>RPS5</i>     | F    | rs136831911 | <i>TMEM17</i>  | M    |
| rs135843349 | <i>PDLIM4</i>  | M    | rs109755996 | <i>RRP7A</i>    | M    | rs137060463 | <i>TMEM98</i>  | M    |
| rs135340897 | <i>PEMT</i>    | M    | rs137808837 | <i>RTN4</i>     | M    | rs43565960  | <i>TNFSF8</i>  | M    |
| rs133122008 | <i>PEX11G</i>  | M    | rs137549891 | <i>SCRNI</i>    | M    | rs135290028 | <i>TNMD</i>    | M    |
| rs137033579 | <i>PGCP</i>    | M    | rs136746215 | <i>SEC14L1</i>  | M    | rs110918953 | <i>TRAM2</i>   | M    |
| rs109506766 | <i>PGR</i>     | I    | rs43321188  | <i>SERPINE2</i> | M    | rs137129346 | <i>TRPV3</i>   | M    |
| rs110835307 | <i>PHGDH</i>   | M    | rs136448399 | <i>SFRP4</i>    | M    | rs137261498 | <i>TSC22D2</i> | M    |
| rs136897415 | <i>PISD</i>    | M    | rs110365063 | <i>SLC18A2</i>  | M    | rs132789482 | <i>TSHB</i>    | M    |
| rs133904031 | <i>PLA2G1B</i> | M    | rs132897655 | <i>SLCIA5</i>   | F    | rs133709728 | <i>TSPAN15</i> | M    |
| rs135040893 | <i>PLAC8L1</i> | M    | rs135216399 | <i>SLC35B1</i>  | M    | rs43445397  | <i>TSPYL1</i>  | M    |
| rs110297919 | <i>PLD2</i>    | N    | rs136807999 | <i>SLC39A13</i> | M    | rs136069690 | <i>TTF1</i>    | M    |
| rs135334440 | <i>PLP2</i>    | M    | rs135002561 | <i>SLC40A1</i>  | M    | rs135236119 | <i>TTL3</i>    | M    |
| rs135342407 | <i>PLXNC1</i>  | M    | rs137656577 | <i>SNX1</i>     | M    | rs134031231 | <i>TXN2</i>    | M    |
| rs109629628 | <i>PMM2</i>    | M    | rs135665173 | <i>SNX27</i>    | M    | rs134335918 | <i>TXNL4B</i>  | M    |
| rs132811001 | <i>POLD2</i>   | M    | rs134807505 | <i>SNX29</i>    | M    | rs137527222 | <i>UBE2D3P</i> | M    |
| rs132800212 | <i>POLL</i>    | M    | rs135563342 | <i>SNX7</i>     | M    | rs134818016 | <i>UHRF1</i>   | F    |
| rs134398664 | <i>POMC</i>    | M    | rs132695659 | <i>SNX9</i>     | F    | rs43707902  | <i>UQCRC2</i>  | M    |
| rs109482560 | <i>POU5F1</i>  | M    | rs135175033 | <i>SPARCL1</i>  | M    | rs133324345 | <i>UTMP</i>    | M    |
| rs110497132 | <i>PPARA</i>   | M    | rs133929040 | <i>SPP1</i>     | M    | rs133485956 | <i>VAT1L</i>   | M    |
| rs133714443 | <i>PPIB</i>    | M    | rs134981429 | <i>SPTBN4</i>   | M    | rs134282928 | <i>WBP1</i>    | M    |
| rs135925432 | <i>PPP1R3F</i> | M    | rs41912290  | <i>SREBF1</i>   | M    | rs133862322 | <i>WDR13</i>   | M    |
| rs136046311 | <i>PPP2R3A</i> | M    | rs42239334  | <i>SSFA2</i>    | M    | rs135193843 | <i>WDR26</i>   | F    |
| rs135992250 | <i>PRKCQ</i>   | M    | rs132679139 | <i>ST13</i>     | M    | rs43332935  | <i>WDR77</i>   | M    |
| rs43158737  | <i>PRLR</i>    | N    | rs137182814 | <i>STAT5A</i>   | S    | rs134496020 | <i>ZDHC16</i>  | M    |
| rs136084042 | <i>PRSS23</i>  | M    | rs135050491 | <i>STUB1</i>    | F    | rs41900150  | <i>ZNF135</i>  | M    |
| rs135545931 | <i>PTGFR</i>   | M    | rs135453446 | <i>SULT2A1</i>  | F    | rs133736498 | <i>ZNF180</i>  | M    |
| rs135033411 | <i>PTPRK</i>   | M    | rs110217852 | <i>SVS8</i>     | M    | rs134468746 | <i>ZNF207</i>  | M    |
| rs133729105 | <i>RABEP2</i>  | M    | rs42158454  | <i>SYTL2</i>    | M    | rs41729882  | <i>ZNF45</i>   | M    |
| rs134108418 | <i>RAGE</i>    | M    | rs42525506  | <i>TAF9</i>     | M    | rs137362861 | <i>ZNF521</i>  | M    |
| rs135078185 | <i>RALGPS1</i> | M    | rs135123038 | <i>TAGLN2</i>   | M    | rs43662395  | <i>ZNF638</i>  | M    |
| rs133947085 | <i>REPS1</i>   | M    | rs110135149 | <i>TALDO1</i>   | M    | rs110883602 | <i>ZP2</i>     | M    |
| rs137380157 | <i>RGS16</i>   | M    | rs110660625 | <i>TBC1D24</i>  | N    | rs133973115 | <i>ZP4</i>     | M    |
| rs137192728 | <i>RHBDF1</i>  | M    | rs110805802 | <i>TDRKH</i>    | M    |             |                |      |

<sup>a</sup>Single nucleotide polymorphism represented as the rs number designated by the National Center for Biotechnology Information dbSNP. For entries not beginning with rs, the abbreviation given by previous researchers was used. <sup>b</sup>Abbreviations are: SNP, single nucleotide polymorphism; Type, type of polymorphism; F, frameshift; I, intron; N, nonsense; M, missense; P, promoter; and S, synonymous.
