# Supplementary material for: Discovery of single nucleotide polymorphisms in candidate genes associated with fertility and production traits in Holstein cattle
Source: PubMed Central journal article supplement (PMC3686577; doi:10.1186/1471-2156-14-49), 2013-06-07
Supplement: 1471-2156-14-49-S2.pdf [file 1471-2156-14-49-S2.pdf]

Table S4. Correlations among predicted transmitting ability for traits on bulls used for genotyping.<sup>a</sup>

|     | DPR                     | HCR                     | CCR                     | PL                      | NM                      | Milk                    | FY                     | FPC                     | PY                     | PPC                     | SCS               |
|-----|-------------------------|-------------------------|-------------------------|-------------------------|-------------------------|-------------------------|------------------------|-------------------------|------------------------|-------------------------|-------------------|
| HCR | 0.61<br>( $< 0.0001$ )  |                         |                         |                         |                         |                         |                        |                         |                        |                         |                   |
| CCR | 0.91<br>( $< 0.0001$ )  | 0.69<br>( $< 0.0001$ )  |                         |                         |                         |                         |                        |                         |                        |                         |                   |
| PL  | 0.81<br>( $< 0.0001$ )  | 0.52<br>( $< 0.0001$ )  | 0.75<br>( $< 0.0001$ )  |                         |                         |                         |                        |                         |                        |                         |                   |
| NM  | 0.49<br>( $< 0.0001$ )  | 0.33<br>( $< 0.0001$ )  | 0.45<br>( $< 0.0001$ )  | 0.83<br>( $< 0.0001$ )  |                         |                         |                        |                         |                        |                         |                   |
| MY  | -0.45<br>( $< 0.0001$ ) | -0.18<br>( $< 0.0001$ ) | -0.38<br>( $< 0.0001$ ) | -0.04<br>(0.3104)       | 0.42<br>( $< 0.0001$ )  |                         |                        |                         |                        |                         |                   |
| FY  | -0.35<br>( $< 0.0001$ ) | -0.17<br>( $< 0.0001$ ) | -0.31<br>( $< 0.0001$ ) | 0.06<br>(0.1568)        | 0.55<br>( $< 0.0001$ )  | 0.74<br>( $< 0.0001$ )  |                        |                         |                        |                         |                   |
| FPC | 0.16<br>(0.0002)        | 0.03<br>(0.4158)        | 0.11<br>(0.0077)        | 0.13<br>(0.0019)        | 0.14<br>(0.0007)        | -0.42<br>( $< 0.0001$ ) | 0.30<br>( $< 0.0001$ ) |                         |                        |                         |                   |
| PY  | -0.34<br>( $< 0.0001$ ) | -0.15<br>(0.0006)       | -0.30<br>( $< 0.0001$ ) | 0.07<br>(0.0904)        | 0.57<br>( $< 0.0001$ )  | 0.93<br>( $< 0.0001$ )  | 0.83<br>( $< 0.0001$ ) | -0.19<br>( $< 0.0001$ ) |                        |                         |                   |
| PPC | 0.31<br>( $< 0.0001$ )  | 0.12<br>(0.0061)        | 0.24<br>( $< 0.0001$ )  | 0.28<br>( $< 0.0001$ )  | 0.30<br>( $< 0.0001$ )  | -0.33<br>( $< 0.0001$ ) | 0.12<br>(0.0035)       | 0.64<br>( $< 0.0001$ )  | 0.04<br>(0.298)        |                         |                   |
| SCS | -0.55<br>( $< 0.0001$ ) | -0.24<br>( $< 0.0001$ ) | -0.50<br>( $< 0.0001$ ) | -0.66<br>( $< 0.0001$ ) | -0.56<br>( $< 0.0001$ ) | 0.15<br>(0.0004)        | 0.04<br>(0.3787)       | -0.15<br>(0.0003)       | 0.08<br>(0.0748)       | -0.20<br>( $< 0.0001$ ) |                   |
| BY  | -0.15<br>(0.0004)       | -0.01<br>(0.7883)       | -0.14<br>(0.0014)       | 0.15<br>(0.0006)        | 0.52<br>( $< 0.0001$ )  | 0.63<br>( $< 0.0001$ )  | 0.62<br>( $< 0.0001$ ) | -0.05<br>(0.275)        | 0.70<br>( $< 0.0001$ ) | 0.10<br>(0.0201)        | -0.04<br>(0.4066) |

<sup>a</sup>Abbreviations are as follows: DPR, daughter pregnancy rate; HCR, heifer conception rate; CCR, cow conception rate, PL, productive life; NM, net merit; MY, milk yield; FY, fat yield, FPC, fat percent, PY, protein yield; PPC, protein percent; SCS, somatic cell score; BY, birth year. <sup>b</sup>The *P* value of each correlation is in parentheses.

Table S5. Correlations, within DPR class, among predicted transmitting ability for traits on bulls used for genotyping.<sup>ab</sup>

|     | DPRC | DPR          | HCR          | CCR          | PL           | NM           | MY           | FY           | FPC          | PY           | PPC          | SCS          |
|-----|------|--------------|--------------|--------------|--------------|--------------|--------------|--------------|--------------|--------------|--------------|--------------|
| HCR | High | <b>0.18</b>  |              |              |              |              |              |              |              |              |              |              |
|     | low  | 0.06         |              |              |              |              |              |              |              |              |              |              |
| CCR | High | <b>0.30</b>  | <b>0.53</b>  |              |              |              |              |              |              |              |              |              |
|     | low  | <b>0.42</b>  | <b>0.32</b>  |              |              |              |              |              |              |              |              |              |
| PL  | High | -0.01        | 0.10         | <b>0.14</b>  |              |              |              |              |              |              |              |              |
|     | low  | <b>0.55</b>  | 0.05         | <b>0.20</b>  |              |              |              |              |              |              |              |              |
| NM  | High | <b>-0.19</b> | 0.04         | 0.03         | <b>0.89</b>  |              |              |              |              |              |              |              |
|     | low  | <b>0.43</b>  | 0.08         | 0.10         | <b>0.77</b>  |              |              |              |              |              |              |              |
| MY  | High | <b>-0.31</b> | 0.02         | 0.04         | <b>0.72</b>  | <b>0.86</b>  |              |              |              |              |              |              |
|     | low  | 0.00         | <b>0.22</b>  | -0.05        | <b>0.18</b>  | <b>0.61</b>  |              |              |              |              |              |              |
| FY  | High | <b>-0.30</b> | -0.01        | -0.06        | <b>0.66</b>  | <b>0.89</b>  | <b>0.75</b>  |              |              |              |              |              |
|     | low  | 0.11         | <b>0.14</b>  | 0.04         | <b>0.38</b>  | <b>0.79</b>  | <b>0.57</b>  |              |              |              |              |              |
| FPC | High | 0.01         | -0.05        | <b>-0.14</b> | -0.08        | 0.06         | <b>-0.33</b> | <b>0.37</b>  |              |              |              |              |
|     | low  | 0.11         | -0.10        | 0.10         | <b>0.20</b>  | <b>0.14</b>  | <b>-0.52</b> | <b>0.40</b>  |              |              |              |              |
| PY  | High | <b>-0.31</b> | 0.02         | 0.00         | <b>0.73</b>  | <b>0.93</b>  | <b>0.94</b>  | <b>0.85</b>  | -0.10        |              |              |              |
|     | low  | 0.05         | <b>0.15</b>  | -0.08        | <b>0.23</b>  | <b>0.71</b>  | <b>0.89</b>  | <b>0.69</b>  | <b>-0.27</b> |              |              |              |
| PPC | High | -0.01        | -0.01        | -0.10        | 0.05         | <b>0.21</b>  | <b>-0.15</b> | <b>0.31</b>  | <b>0.66</b>  | <b>0.20</b>  |              |              |
|     | low  | 0.11         | <b>-0.18</b> | -0.06        | 0.07         | 0.11         | <b>-0.39</b> | <b>0.15</b>  | <b>0.59</b>  | 0.08         |              |              |
| SCS | High | -0.04        | 0.00         | 0.00         | <b>-0.47</b> | <b>-0.42</b> | <b>-0.18</b> | <b>-0.23</b> | -0.07        | <b>-0.23</b> | <b>-0.12</b> |              |
|     | low  | <b>-0.33</b> | <b>0.22</b>  | <b>-0.14</b> | <b>-0.51</b> | <b>-0.43</b> | 0.03         | -0.09        | -0.12        | 0.05         | 0.04         |              |
| BY  | High | <b>-0.21</b> | 0.10         | 0.02         | <b>0.61</b>  | <b>0.78</b>  | <b>0.70</b>  | <b>0.70</b>  | 0.02         | <b>0.77</b>  | <b>0.22</b>  | <b>-0.23</b> |
|     | low  | -0.04        | 0.08         | <b>-0.13</b> | 0.10         | <b>0.47</b>  | <b>0.52</b>  | <b>0.46</b>  | -0.10        | <b>0.59</b>  | 0.05         | 0.00         |

<sup>a</sup>Abbreviations are as follows: DPRC, daughter pregnancy rate class; DPR, daughter pregnancy rate; HCR, heifer conception rate; CCR, cow conception rate, PL, productive life; NM, net merit; MY, milk yield; FY, fat yield, FPC, fat percent, PY, protein yield; PPC, protein percent; SCS, somatic cell score; BY, birth year. <sup>b</sup>Bold numbers represent significant correlations ( $P < 0.05$ ).

Table S6. Information for all SNPs with minor allele frequencies (MAF) > 5% and call rates > 70%.<sup>ab</sup>

| SNP         | Gene symbol     | Type | Chrom | Location | Alleles and flanking sequence        | Call rate | Genotype |          | MAF (%) | HWE      | Reference |
|-------------|-----------------|------|-------|----------|--------------------------------------|-----------|----------|----------|---------|----------|-----------|
|             |                 |      |       |          |                                      | (%)       | Genotype | freq (%) |         |          |           |
| rs109967779 | <i>ACAT2</i>    | M    | 9     | 97478396 | CTCACTTGCCATTGT[T/C]TGGCCACATTTTCAG  | 97.09     | C/C      | 15.54    | 37.17   | 0.09     | 27        |
|             |                 |      |       |          |                                      |           | C/T      | 43.26    |         |          |           |
|             |                 |      |       |          |                                      |           | T/T      | 41.20    |         |          |           |
| rs133700190 | <i>AP3B1</i>    | M    | 10    | 8878196  | ATCATGTGCATACCTA[T/C]TGCTACGAAGTAAAC | 95.27     | T/T      | 4.58     | 20.52   | 0.60     | 40        |
|             |                 |      |       |          |                                      |           | T/C      | 31.87    |         |          |           |
|             |                 |      |       |          |                                      |           | C/C      | 63.55    |         |          |           |
| rs41766835  | <i>APBB1</i>    | M    | 15    | 45979436 | CCTGGCCTGATCATC[A/G]GCACCCAAGAGCAGG  | 92.00     | G/G      | 4.74     | 19.47   | 0.17     | 38        |
|             |                 |      |       |          |                                      |           | G/A      | 29.45    |         |          |           |
|             |                 |      |       |          |                                      |           | A/A      | 65.81    |         |          |           |
| rs110541595 | <i>ARL6IP1</i>  | N    | 25    | 17497785 | CTCTACTTAAAT AAG[A/T]CAAAACCAAAAAAGT | 90.36     | A/A      | 16.90    | 40.04   | 0.42     | 38        |
|             |                 |      |       |          |                                      |           | A/T      | 46.28    |         |          |           |
|             |                 |      |       |          |                                      |           | T/T      | 36.82    |         |          |           |
| rs110127056 | <i>ASL</i>      | M    | 25    | 29655489 | GCTCCACGCTGTGT[C/G]GTAGTCCCACACGTG   | 96.55     | G/G      | 21.66    | 45.29   | 0.29     | 38        |
|             |                 |      |       |          |                                      |           | G/C      | 47.27    |         |          |           |
|             |                 |      |       |          |                                      |           | C/C      | 31.07    |         |          |           |
| rs110909003 | <i>ATP5A1</i>   | M    | 24    | 47453621 | CATACCTGATTTTGC[T/C]CAACAGGGCCTGATG  | 70.73     | T/T      | 25.19    | 48.20   | 0.12     | 27        |
|             |                 |      |       |          |                                      |           | T/C      | 46.02    |         |          |           |
|             |                 |      |       |          |                                      |           | C/C      | 28.79    |         |          |           |
| rs43114141  | <i>AVP</i>      | M    | 13    | 52663154 | GAGTGCCGGGAAGGT[A/G]TCGGCTTCCCCGCC   | 88.18     | A/A      | 24.54    | 44.54   | < 0.0001 |           |
|             |                 |      |       |          |                                      |           | A/G      | 40.00    |         |          |           |
|             |                 |      |       |          |                                      |           | G/G      | 35.46    |         |          |           |
| rs109669573 | <i>BCAS1</i>    | M    | 13    | 82536290 | GCTTGTGGTCTCCG[T/C]GGCTGCCTTTTTGTC   | 95.82     | T/T      | 18.79    | 42.13   | 0.33     | 38        |
|             |                 |      |       |          |                                      |           | T/C      | 46.68    |         |          |           |
|             |                 |      |       |          |                                      |           | C/C      | 34.54    |         |          |           |
| rs133674837 | <i>BDH2</i>     | M    | 6     | 23368958 | CACCGATATCAATGA[A/C]TCCAACTT CAGGAA  | 98.18     | A/A      | 15.56    | 38.61   | 0.53     | 46        |
|             |                 |      |       |          |                                      |           | A/C      | 46.11    |         |          |           |
|             |                 |      |       |          |                                      |           | C/C      | 38.33    |         |          |           |
| rs109032590 | <i>BOLA-DMB</i> | M    | 23    | 7456451  | CTCCGTTGGGCTGGA[T/C]GATCCTCCAGGCCCT  | 95.09     | T/T      | 10.90    | 29.92   | 0.03     | 38        |
|             |                 |      |       |          |                                      |           | C/T      | 38.05    |         |          |           |
|             |                 |      |       |          |                                      |           | C/C      | 51.05    |         |          |           |

Table S6 (continued).<sup>ab</sup>

| SNP         | Gene symbol        | Type | Chrom | Location  | Alleles and flanking sequence        | Call rate | Genotype |          | MAF (%) | HWE  | Reference |
|-------------|--------------------|------|-------|-----------|--------------------------------------|-----------|----------|----------|---------|------|-----------|
|             |                    |      |       |           |                                      | (%)       | Genotype | freq (%) |         |      |           |
| rs110217852 | <i>BSP3</i>        | M    | 18    | 51328727  | GGAGTACATTTATGA[A/G]CTATTGGTGCTCACT  | 97.09     | A/A      | 9.93     | 30.34   | 0.43 | 26        |
|             |                    |      |       |           |                                      |           | A/G      | 40.82    |         |      |           |
|             |                    |      |       |           |                                      |           | G/G      | 49.25    |         |      |           |
| rs133455683 | <i>C17H22orf25</i> | M    | 17    | 76444097  | TACGGAAACCGGGG[A/G]AGCGGGAGCCTGTTG   | 92.18     | A/A      | 19.53    | 41.12   | 0.02 | 32        |
|             |                    |      |       |           |                                      |           | A/G      | 43.20    |         |      |           |
|             |                    |      |       |           |                                      |           | G/G      | 37.28    |         |      |           |
| rs135390325 | <i>C1QB</i>        | M    | 2     | 134538911 | CCCGGGCACCTTGCAC[A/G]TGAAGTTGCTGCTCC | 98.36     | A/A      | 0.37     | 9.61    | 0.14 | 38        |
|             |                    |      |       |           |                                      |           | A/G      | 18.48    |         |      |           |
|             |                    |      |       |           |                                      |           | G/G      | 81.15    |         |      |           |
| rs134150850 | <i>C28H10ORF10</i> | M    | 28    | 44812770  | CTCTGCAGAGAACAT[T/C]GAGGGACTGGCACCA  | 94.91     | C/C      | 18.58    | 42.72   | 0.76 | 38        |
|             |                    |      |       |           |                                      |           | C/T      | 48.28    |         |      |           |
|             |                    |      |       |           |                                      |           | T/T      | 33.14    |         |      |           |
| rs109332658 | <i>C7H19orf60</i>  | M    | 7     | 4529011   | CACACCAGCTCCTCG[T/C]GCTCTGGGACTCCAG  | 93.64     | T/T      | 7.57     | 27.18   | 0.83 | 38        |
|             |                    |      |       |           |                                      |           | T/C      | 39.22    |         |      |           |
|             |                    |      |       |           |                                      |           | C/C      | 53.20    |         |      |           |
| rs135744058 | <i>CACNA1D</i>     | M    | 22    | 48255786  | GGTAGCCTCGAGGCC[A/G]CTCAAAGTCCAAGCT  | 98.55     | G/G      | 6.27     | 25.74   | 0.67 | 25        |
|             |                    |      |       |           |                                      |           | G/A      | 38.93    |         |      |           |
|             |                    |      |       |           |                                      |           | A/A      | 54.80    |         |      |           |
| rs42940189  | <i>CALCR</i>       | M    | 4     | 11008943  | TGTACCAAACCCCAT[T/C]TCTCACAATACTT    | 84.73     | T/T      | 1.07     | 9.23    | 0.57 | 25        |
|             |                    |      |       |           |                                      |           | T/C      | 16.31    |         |      |           |
|             |                    |      |       |           |                                      |           | C/C      | 82.62    |         |      |           |
| rs137601357 | <i>CAST</i>        | M    | 7     | 97350820  | CTGGTGAAAAAGCCC[T/C]GGTCCCAAGGTGAG   | 99.09     | C/C      | 18.53    | 42.84   | 0.87 | 15        |
|             |                    |      |       |           |                                      |           | C/T      | 48.62    |         |      |           |
|             |                    |      |       |           |                                      |           | T/T      | 32.84    |         |      |           |
| rs109405883 | <i>CCDC137</i>     | M    | 19    | 52643332  | GGACATAGGCCCTGT[T/C]GGACTCCCACTTCCT  | 92.00     | T/T      | 23.91    | 48.72   | 0.87 | 25        |
|             |                    |      |       |           |                                      |           | T/C      | 49.60    |         |      |           |
|             |                    |      |       |           |                                      |           | C/C      | 26.48    |         |      |           |
| rs109447102 | <i>CCDC86</i>      | M    | 29    | 38918350  | CCGGTCAGAAAGCAC[T/C]GGGTCCGAGCCCTC   | 95.27     | C/C      | 4.20     | 18.42   | 0.22 | 32        |
|             |                    |      |       |           |                                      |           | C/T      | 28.44    |         |      |           |
|             |                    |      |       |           |                                      |           | T/T      | 67.37    |         |      |           |

Table S6 (continued).<sup>ab</sup>

| SNP         | Gene symbol    | Type | Chrom | Location  | Alleles and flanking sequence        | Call rate | Genotype |          | MAF (%) | HWE     | Reference |
|-------------|----------------|------|-------|-----------|--------------------------------------|-----------|----------|----------|---------|---------|-----------|
|             |                |      |       |           |                                      | (%)       | Genotype | freq (%) |         |         |           |
| rs41652321  | <i>CCDC88B</i> | M    | 29    | 44427483  | GAAGACTCGGTGATT[C/G]GAGAGCCGGACTTAG  | 96.36     | G/G      | 1.51     | 8.58    | 0.02    | 25        |
|             |                |      |       |           |                                      |           | G/C      | 14.15    |         |         |           |
|             |                |      |       |           |                                      |           | C/C      | 84.34    |         |         |           |
| rs137673698 | <i>CCT8</i>    | M    | 1     | 6426316   | ACTTACCTGGGAAAA[T/C]ACTGGGCTATTAAAC  | 97.64     | T/T      | 0.19     | 46.93   | <0.0001 | 27        |
|             |                |      |       |           |                                      |           | T/C      | 93.48    |         |         |           |
|             |                |      |       |           |                                      |           | C/C      | 6.33     |         |         |           |
| rs109621328 | <i>CD14</i>    | M    | 7     | 51051802  | GTGCTTGGGCAATGT[T/C]CAGCACCTGAGCCC   | 98.36     | C/C      | 1.11     | 7.58    | 0.08    | 35        |
|             |                |      |       |           |                                      |           | C/T      | 12.94    |         |         |           |
|             |                |      |       |           |                                      |           | T/T      | 85.95    |         |         |           |
| rs133747802 | <i>CD2</i>     | M    | 3     | 28824448  | CACACGGCGATCTCC[A/G]TGCTGACTTCTTAT   | 80.91     | G/G      | 34.16    | 40.22   | <0.0001 | 32        |
|             |                |      |       |           |                                      |           | G/A      | 12.13    |         |         |           |
|             |                |      |       |           |                                      |           | A/A      | 53.71    |         |         |           |
| rs41711496  | <i>CD40</i>    | M    | 13    | 75633238  | TCGACACATACACAA[A/G]TGGTGTCTGTATTCA  | 97.27     | A/A      | 26.36    | 49.72   | 0.13    | 38        |
|             |                |      |       |           |                                      |           | A/G      | 46.73    |         |         |           |
|             |                |      |       |           |                                      |           | G/G      | 26.92    |         |         |           |
| rs41857027  | <i>CFDP2</i>   | M    | 18    | 2160205   | CGGCGCCTTTTCTCT[T/G]CTCTGCAGCTGCATC  | 86.91     | T/T      | 8.58     | 17.15   | <0.0001 | 34        |
|             |                |      |       |           |                                      |           | T/G      | 17.15    |         |         |           |
|             |                |      |       |           |                                      |           | G/G      | 74.27    |         |         |           |
| rs109301586 | <i>COQ9</i>    | M    | 18    | 25217841  | TTGGATCAGCAGAAG[A/G]ATCAACCCCGCCCT   | 92.91     | G/G      | 28.96    | 48.53   | <0.0001 | 33        |
|             |                |      |       |           |                                      |           | G/A      | 39.14    |         |         |           |
|             |                |      |       |           |                                      |           | A/A      | 31.90    |         |         |           |
| rs134432442 | <i>CPSF1</i>   | M    | 14    | 1736599   | AGCGTGTGGACGCCA[T/C]CACGGGCTGGTCAGG  | 95.27     | T/T      | 5.73     | 22.71   | 0.46    | 37        |
|             |                |      |       |           |                                      |           | T/C      | 33.97    |         |         |           |
|             |                |      |       |           |                                      |           | C/C      | 60.31    |         |         |           |
| rs133449166 | <i>CSNK1E</i>  | M    | 5     | 116920083 | CCAGGGAGAAGGAAG[A/C]CACAATGAAGGGGTC  | 94.73     | C/C      | 17.47    | 40.60   | 0.35    | 34        |
|             |                |      |       |           |                                      |           | C/A      | 46.26    |         |         |           |
|             |                |      |       |           |                                      |           | A/A      | 36.28    |         |         |           |
| rs109443582 | <i>CSPP1</i>   | M    | 14    | 31281509  | CACCGGGT GACGAC[A/G]GATCAAACCTCTGTAG | 90.00     | A/A      | 0.40     | 6.87    | 0.81    | 38        |
|             |                |      |       |           |                                      |           | A/G      | 12.93    |         |         |           |
|             |                |      |       |           |                                      |           | G/G      | 86.67    |         |         |           |

Table S6 (continued).<sup>ab</sup>

| SNP         | Gene symbol   | Type | Chrom | Location | Alleles and flanking sequence         | Call rate | Genotype |          | MAF (%) | HWE     | Reference |
|-------------|---------------|------|-------|----------|---------------------------------------|-----------|----------|----------|---------|---------|-----------|
|             |               |      |       |          |                                       | (%)       | Genotype | freq (%) |         |         |           |
| rs110270752 | <i>DEPDC7</i> | M    | 15    | 63421395 | TAATGGATCATCAA[A/G]AGATGTTTTAAGGT     | 94.18     | A/A      | 5.79     | 20.95   | 0.05    | 33        |
|             |               |      |       |          |                                       |           | A/G      | 30.31    |         |         |           |
|             |               |      |       |          |                                       |           | G/G      | 63.90    |         |         |           |
| rs110629231 | <i>DNAH11</i> | M    | 4     | 31908360 | CTGAGTCTGCATCTA[T/C]ACCCAGCGAGCATGT   | 98.00     | T/T      | 11.69    | 32.93   | 0.38    | 25        |
|             |               |      |       |          |                                       |           | T/C      | 42.49    |         |         |           |
|             |               |      |       |          |                                       |           | C/C      | 45.83    |         |         |           |
| rs109455239 | <i>DOK2</i>   | M    | 8     | 72427041 | GGGACAGTGGCGAC[A/G]GTGGTGGCAGCGAGT    | 95.09     | A/A      | 4.40     | 20.27   | 0.68    | 25        |
|             |               |      |       |          |                                       |           | A/G      | 31.74    |         |         |           |
|             |               |      |       |          |                                       |           | G/G      | 63.86    |         |         |           |
| rs109503725 | <i>DSC2</i>   | M    | 24    | 27124361 | CCAGTCATACGT CAG[T/C]GGACGGTGGT CATCT | 97.27     | C/C      | 26.54    | 49.63   | 0.08    | 29        |
|             |               |      |       |          |                                       |           | C/T      | 46.17    |         |         |           |
|             |               |      |       |          |                                       |           | T/T      | 27.29    |         |         |           |
| rs42075611  | <i>DTX2</i>   | M    | 25    | 36615779 | CATCATCTGTATGGA[C/G]AAGCTGTCCGTGGCG   | 87.82     | C/C      | 3.11     | 7.35    | <0.0001 | 31        |
|             |               |      |       |          |                                       |           | C/G      | 8.49     |         |         |           |
|             |               |      |       |          |                                       |           | G/G      | 88.41    |         |         |           |
| rs109561866 | <i>DYRK3</i>  | M    | 16    | 3449362  | GCAAAGATTGGGTGA[T/C]GGCACTGAAAGGGTG   | 96.18     | T/T      | 1.13     | 11.15   | 0.80    | 33        |
|             |               |      |       |          |                                       |           | T/C      | 20.04    |         |         |           |
|             |               |      |       |          |                                       |           | C/C      | 78.83    |         |         |           |
| rs133175991 | <i>DZIP3</i>  | M    | 1     | 54924494 | TCAGTTTCTCCATAT[T/C]CTGTAGTTATCTTGG   | 87.64     | C/C      | 3.73     | 19.29   | 0.99    | 32        |
|             |               |      |       |          |                                       |           | C/T      | 31.12    |         |         |           |
|             |               |      |       |          |                                       |           | T/T      | 65.15    |         |         |           |
| rs43676052  | <i>EPAS1</i>  | M    | 11    | 29886509 | GGCCAAGCAGCTCTT[C/G]AGGGTGGTAACCAAC   | 97.64     | G/G      | 3.54     | 21.69   | 0.11    | 38        |
|             |               |      |       |          |                                       |           | G/C      | 36.31    |         |         |           |
|             |               |      |       |          |                                       |           | C/C      | 60.15    |         |         |           |
| rs135071345 | <i>FAM5C</i>  | M    | 16    | 14213274 | GCGCCAATAGCTCCT[T/C]GGTTACTCTGGAGAC   | 98.55     | C/C      | 2.21     | 15.96   | 0.56    | 25        |
|             |               |      |       |          |                                       |           | C/T      | 27.49    |         |         |           |
|             |               |      |       |          |                                       |           | T/T      | 70.30    |         |         |           |
| rs109137982 | <i>FCER1G</i> | M    | 3     | 9216708  | CTTGTTC AACCAAAA[A/G]GAGTAAGAGCAGGAC  | 98.91     | A/A      | 0.55     | 9.65    | 0.31    | 38        |
|             |               |      |       |          |                                       |           | A/G      | 18.20    |         |         |           |
|             |               |      |       |          |                                       |           | G/G      | 81.25    |         |         |           |

Table S6 (continued).<sup>ab</sup>

| SNP         | Gene symbol     | Type | Chrom | Location | Alleles and flanking sequence         | Call rate | Genotype |          | MAF (%) | HWE  | Reference |
|-------------|-----------------|------|-------|----------|---------------------------------------|-----------|----------|----------|---------|------|-----------|
|             |                 |      |       |          |                                       | (%)       | Genotype | freq (%) |         |      |           |
| FGF2ag      | <i>FGF2</i>     | I    | 17    | 1186     | GT TAGGGCCCACTCT[A/G]T AACAGCCCCATTTT | 99.45     | A/A      | 14.08    | 35.56   | 0.14 | 16        |
|             |                 |      |       |          |                                       |           | A/G      | 42.96    |         |      |           |
|             |                 |      |       |          |                                       |           | G/G      | 42.96    |         |      |           |
| rs43745234  | <i>FSHR</i>     | M    | 11    | 32613008 | CTGCTATACATCGAC[C/G]CTGATGCCTTCCAGA   | 98.91     | G/G      | 8.64     | 30.42   | 0.50 |           |
|             |                 |      |       |          |                                       |           | G/C      | 43.57    |         |      |           |
|             |                 |      |       |          |                                       |           | C/C      | 47.79    |         |      |           |
| rs109247499 | <i>FST</i>      | M    | 20    | 27301549 | TGCGGTGAGCTGTGC[C/G]CTGAGAGTAAGTCTG   | 96.91     | C/C      | 26.27    | 49.81   | 0.18 | 43        |
|             |                 |      |       |          |                                       |           | C/G      | 47.09    |         |      |           |
|             |                 |      |       |          |                                       |           | G/G      | 26.64    |         |      |           |
| rs41893756  | <i>FUT1</i>     | M    | 18    | 55205427 | CTACGGTCTGGACAC[A/G]GCAGGAACAGGTCTA   | 96.36     | G/G      | 5.47     | 19.43   | 0.01 | 30        |
|             |                 |      |       |          |                                       |           | G/A      | 27.92    |         |      |           |
|             |                 |      |       |          |                                       |           | A/A      | 66.60    |         |      |           |
| rs109262355 | <i>FYB</i>      | M    | 20    | 37482030 | CCTCTCTGTGGAGCC[A/G]CAGTCTTGGTGGGGC   | 97.27     | G/G      | 15.14    | 37.20   | 0.20 | 32        |
|             |                 |      |       |          |                                       |           | G/A      | 44.11    |         |      |           |
|             |                 |      |       |          |                                       |           | A/A      | 40.75    |         |      |           |
| rs109830880 | <i>GCNT3</i>    | M    | 10    | 51100846 | GTGATCCCAGAACAG[T/C]TGATGGATCTCTTTG   | 75.45     | C/C      | 1.69     | 13.01   | 0.99 | 33        |
|             |                 |      |       |          |                                       |           | CT       | 22.65    |         |      |           |
|             |                 |      |       |          |                                       |           | T/T      | 75.66    |         |      |           |
| rs42339105  | <i>GOLGA4</i>   | M    | 22    | 10888644 | TTAAGTTGGGATTCA[T/G]AGAGCTGGGTAAAG    | 90.91     | G/G      | 0.40     | 8.90    | 0.28 | 30        |
|             |                 |      |       |          |                                       |           | GT       | 17.00    |         |      |           |
|             |                 |      |       |          |                                       |           | T/T      | 82.60    |         |      |           |
| rs109516714 | <i>GPLDI</i>    | M    | 23    | 33332090 | TTGGAGAGGAGTATA[T/C]GGGAGATGTTATTG    | 95.09     | C/C      | 16.44    | 39.87   | 0.60 | 38        |
|             |                 |      |       |          |                                       |           | CT       | 46.85    |         |      |           |
|             |                 |      |       |          |                                       |           | T/T      | 36.71    |         |      |           |
| rs110733329 | <i>HAX1</i>     | M    | 3     | 17635327 | GGAGT CACGTGGGC[T/C]GTGGAACTCGAGGT    | 98.36     | T/T      | 0.55     | 6.75    | 0.71 | 38        |
|             |                 |      |       |          |                                       |           | T/C      | 12.38    |         |      |           |
|             |                 |      |       |          |                                       |           | C/C      | 87.06    |         |      |           |
| rs109711583 | <i>HSD17B12</i> | M    | 15    | 74233184 | AAACTGGCTAAAATC[A/G]GAAAGCCAACTTTGG   | 98.18     | G/G      | 19.26    | 43.98   | 0.94 |           |
|             |                 |      |       |          |                                       |           | G/A      | 49.44    |         |      |           |
|             |                 |      |       |          |                                       |           | A/A      | 31.30    |         |      |           |

Table S6 (continued).<sup>ab</sup>

| SNP         | Gene symbol    | Type | Chrom | Location  | Alleles and flanking sequence         | Call rate | Genotype |          | MAF (%) | HWE  | Reference |
|-------------|----------------|------|-------|-----------|---------------------------------------|-----------|----------|----------|---------|------|-----------|
|             |                |      |       |           |                                       | (%)       | Genotype | freq (%) |         |      |           |
| rs43079452  | <i>HSD17B3</i> | M    | 8     | 87190501  | TCTTTCTTGAAGTCA[A/G]TGGGAGAATGGGCAG   | 98.36     | G/G      | 1.85     | 14.23   | 0.74 |           |
|             |                |      |       |           |                                       |           | G/A      | 24.77    |         |      |           |
|             |                |      |       |           |                                       |           | A/A      | 73.38    |         |      |           |
| rs109769865 | <i>HSD17B6</i> | M    | 5     | 61129370  | ACCACCTGCCTCTCT[T/C]GGTACCAGCGCAGGA   | 96.55     | T/T      | 3.01     | 14.03   | 0.05 |           |
|             |                |      |       |           |                                       |           | T/C      | 22.03    |         |      |           |
|             |                |      |       |           |                                       |           | C/C      | 74.95    |         |      |           |
| rs110828053 | <i>HSD17B7</i> | M    | 3     | 7226375   | AAAATTTTTT CAGCAG[T/C]GTCTTCATCTAGGTC | 98.73     | T/T      | 4.24     | 19.43   | 0.49 |           |
|             |                |      |       |           |                                       |           | T/C      | 30.39    |         |      |           |
|             |                |      |       |           |                                       |           | C/C      | 65.38    |         |      |           |
| HSP70C895D  | <i>HSPA1A</i>  | P    | 23    | Unknown   | TTGGTTCAGAAAGC[-/C]AGGGGCAGGACTTG     | 99.45     | -/-      | 8.41     | 28.24   | 0.62 | 23        |
|             |                |      |       |           |                                       |           | -/C      | 39.67    |         |      |           |
|             |                |      |       |           |                                       |           | C/C      | 51.92    |         |      |           |
| rs110789098 | <i>IBSP</i>    | M    | 6     | 37683555  | CATACTCCCAGGGG[T/C]GGTGATTTTCCCAA     | 93.82     | C/C      | 22.09    | 43.80   | 0.01 | 32        |
|             |                |      |       |           |                                       |           | C/T      | 43.41    |         |      |           |
|             |                |      |       |           |                                       |           | T/T      | 34.50    |         |      |           |
| rs133621844 | <i>IFNT2</i>   | M    | 8     | 23638202  | TGTAGAAGAGGTTGA[A/G]GCACTGCTGGAGCAT   | 95.64     | A/A      | 0.57     | 12.45   | 0.04 |           |
|             |                |      |       |           |                                       |           | A/G      | 23.76    |         |      |           |
|             |                |      |       |           |                                       |           | G/G      | 75.67    |         |      |           |
| rs110953315 | <i>IRF9</i>    | M    | 10    | 21270470  | CACTTTGGGAAGAGT[A/G]AGACCCTGGCCCTTG   | 98.55     | A/A      | 2.21     | 14.67   | 0.91 | 28        |
|             |                |      |       |           |                                       |           | A/G      | 24.91    |         |      |           |
|             |                |      |       |           |                                       |           | G/G      | 72.88    |         |      |           |
| rs111015912 | <i>LDB3</i>    | M    | 28    | 41302317  | AGAACCAGAACAAAGC[T/C]GGAAGATGAGGCTGAT | 96.00     | T/T      | 4.73     | 22.25   | 0.77 | 40        |
|             |                |      |       |           |                                       |           | T/C      | 35.04    |         |      |           |
|             |                |      |       |           |                                       |           | C/C      | 60.23    |         |      |           |
| rs41256848  | <i>LHCGR</i>   | M    | 11    | 32192962  | CACACTAGAAAGATG[T/G]CACACCATCACCTAT   | 99.27     | T/T      | 17.03    | 42.31   | 0.41 |           |
|             |                |      |       |           |                                       |           | T/G      | 50.55    |         |      |           |
|             |                |      |       |           |                                       |           | G/G      | 32.42    |         |      |           |
| rs43362191  | <i>MACF1</i>   | M    | 3     | 113759645 | ATGCGTTGTCTTGCC[A/G]AGCATCTTTGTCAGT   | 97.45     | A/A      | 18.84    | 41.88   | 0.22 | 38        |
|             |                |      |       |           |                                       |           | A/G      | 46.08    |         |      |           |
|             |                |      |       |           |                                       |           | G/G      | 35.07    |         |      |           |

Table S6 (continued).<sup>ab</sup>

| SNP         | Gene symbol     | Type | Chrom | Location | Alleles and flanking sequence       | Call rate | Genotype |          | MAF (%) | HWE     | Reference |
|-------------|-----------------|------|-------|----------|-------------------------------------|-----------|----------|----------|---------|---------|-----------|
|             |                 |      |       |          |                                     | (%)       | Genotype | freq (%) |         |         |           |
| rs134011564 | <i>MARVELD1</i> | M    | 26    | 20538410 | CTTGGTACCGGCTGG[T/G]GGCGATGGTGATCCA | 78.36     | G/G      | 0.46     | 42.81   | <0.0001 | 38        |
|             |                 |      |       |          |                                     |           | G/T      | 84.69    |         |         |           |
|             |                 |      |       |          |                                     |           | T/T      | 14.85    |         |         |           |
| rs41859871  | <i>MON1B</i>    | M    | 18    | 3302068  | AACGAATGAAGAGCC[A/G]ATCCTCCTCTTTCTT | 99.27     | A/A      | 1.10     | 11.45   | 0.63    | 33        |
|             |                 |      |       |          |                                     |           | A/G      | 20.70    |         |         |           |
|             |                 |      |       |          |                                     |           | G/G      | 78.21    |         |         |           |
| rs109248655 | <i>MRGPRF</i>   | M    | 29    | 48282900 | CAGGAAGATGTAGTT[T/C]ATGATGGCCGCGGC  | 97.45     | T/T      | 0.00     | 6.62    | 0.35    | 38        |
|             |                 |      |       |          |                                     |           | T/C      | 13.06    |         |         |           |
|             |                 |      |       |          |                                     |           | C/C      | 86.94    |         |         |           |
| rs43703916  | <i>MRPL48</i>   | M    | 15    | 53053970 | CTTTTGCAGATCAGC[A/G]GTTTGAATGCTACGT | 91.82     | A/A      | 24.16    | 49.21   | 0.96    | 38        |
|             |                 |      |       |          |                                     |           | A/G      | 50.10    |         |         |           |
|             |                 |      |       |          |                                     |           | G/G      | 25.74    |         |         |           |
| rs109761676 | <i>MS4A8B</i>   | M    | 29    | 38810808 | CCTACATCTACCCTT[T/G]GTATGATCCTCCCTC | 94.36     | G/G      | 6.74     | 27.36   | 0.39    | 31        |
|             |                 |      |       |          |                                     |           | G/T      | 41.23    |         |         |           |
|             |                 |      |       |          |                                     |           | T/T      | 52.02    |         |         |           |
| rs133762601 | <i>NEU3</i>     | M    | 15    | 54014799 | GCCCCCTCATGGCTG[T/G]CAAGGCAGTGTGGTG | 92.55     | G/G      | 15.32    | 18.27   | <0.0001 | 35        |
|             |                 |      |       |          |                                     |           | G/T      | 5.89     |         |         |           |
|             |                 |      |       |          |                                     |           | T/T      | 78.78    |         |         |           |
| rs133497176 | <i>NFKB1L1</i>  | M    | 23    | 27512896 | CTTGGGGGAGGGGT[T/C]ACTCATCAGACCTGC  | 96.55     | T/T      | 2.64     | 13.56   | 0.12    | 38        |
|             |                 |      |       |          |                                     |           | T/C      | 21.85    |         |         |           |
|             |                 |      |       |          |                                     |           | C/C      | 75.52    |         |         |           |
| rs109383758 | <i>NLRP9</i>    | M    | 18    | 62170785 | CTTACAGAGGTGAG[T/C]GTTGCAATCCAAGTC  | 99.45     | C/C      | 25.78    | 49.63   | 0.29    | 21        |
|             |                 |      |       |          |                                     |           | C/T      | 47.71    |         |         |           |
|             |                 |      |       |          |                                     |           | T/T      | 26.51    |         |         |           |
| rs42508588  | <i>NT5E</i>     | M    | 9     | 65766876 | AGGATCACCTTGTAC[A/T]CCTTATCCATTCTAA | 97.82     | T/T      | 1.67     | 16.45   | 0.08    | 33        |
|             |                 |      |       |          |                                     |           | T/A      | 29.55    |         |         |           |
|             |                 |      |       |          |                                     |           | A/A      | 68.77    |         |         |           |
| rs134264563 | <i>OCLN</i>     | M    | 20    | 10830360 | GAAGACTCTGGATAC[A/G]GTCGCTTCTCGTTCA | 98.73     | G/G      | 7.92     | 29.01   | 0.58    | 27        |
|             |                 |      |       |          |                                     |           | G/A      | 42.17    |         |         |           |
|             |                 |      |       |          |                                     |           | A/A      | 49.91    |         |         |           |

Table S6 (continued).<sup>ab</sup>

| SNP         | Gene symbol    | Type | Chrom | Location  | Alleles and flanking sequence       | Call rate | Genotype |          | MAF (%) | HWE     | Reference |
|-------------|----------------|------|-------|-----------|-------------------------------------|-----------|----------|----------|---------|---------|-----------|
|             |                |      |       |           |                                     | (%)       | Genotype | freq (%) |         |         |           |
| rs111027720 | <i>PARM1</i>   | M    | 6     | 93134487  | TCACCTCCCCTCAAG[C/G]GCCAGCCTCATCGCC | 97.09     | C/C      | 22.28    | 45.79   | 0.22    | 38        |
|             |                |      |       |           |                                     |           | C/G      | 47.00    |         |         |           |
|             |                |      |       |           |                                     |           | G/G      | 30.71    |         |         |           |
| rs109813896 | <i>PCCB</i>    | M    | 1     | 135150532 | AGGCTCAGTGTGTGA[C/G]TGAGAAGTCTCCGGG | 98.00     | C/C      | 13.36    | 34.97   | 0.25    | 46        |
|             |                |      |       |           |                                     |           | C/G      | 43.23    |         |         |           |
|             |                |      |       |           |                                     |           | G/G      | 43.41    |         |         |           |
| rs109506766 | <i>PGR</i>     | I    | 15    | 6576069   | TAATGGTGATCTAAA[C/G]ACATGGTGATCTGCT | 99.45     | G/G      | 13.53    | 36.47   | 0.82    | 14        |
|             |                |      |       |           |                                     |           | G/C      | 45.89    |         |         |           |
|             |                |      |       |           |                                     |           | C/C      | 40.59    |         |         |           |
| rs41749178  | <i>PLET1</i>   | M    | 15    | 20989944  | GGCTCCTGGGAAAAC[T/C]CCAGCGACCATTGTG | 96.36     | C/C      | 5.85     | 22.36   | 0.26    | 38        |
|             |                |      |       |           |                                     |           | C/T      | 33.02    |         |         |           |
|             |                |      |       |           |                                     |           | T/T      | 61.13    |         |         |           |
| rs109629628 | <i>PMM2</i>    | M    | 25    | 8565782   | TCGTGGAGGATCTGC[A/G]AAAAGAGTTTGCTGG | 95.64     | G/G      | 14.26    | 38.02   | 0.85    | 32        |
|             |                |      |       |           |                                     |           | G/A      | 47.53    |         |         |           |
|             |                |      |       |           |                                     |           | A/A      | 38.21    |         |         |           |
| rs133729105 | <i>RABEP2</i>  | M    | 25    | 27716726  | AAGGACCTGGAGAGC[A/G]TCAGCCGGGAGCGGG | 96.18     | A/A      | 15.69    | 37.43   | 0.10    | 38        |
|             |                |      |       |           |                                     |           | A/G      | 43.48    |         |         |           |
|             |                |      |       |           |                                     |           | G/G      | 40.83    |         |         |           |
| rs135078185 | <i>RALGPS1</i> | M    | 11    | 101468911 | TCTGTGGCCGGCAGC[A/C]TCCCCACACCCCGG  | 82.00     | A/A      | 30.16    | 30.49   | <0.0001 | 32        |
|             |                |      |       |           |                                     |           | A/C      | 0.67     |         |         |           |
|             |                |      |       |           |                                     |           | C/C      | 69.18    |         |         |           |
| rs43572154  | <i>ROR2</i>    | M    | 8     | 90424655  | CGGGGCTCTGGGCCA[T/C]GTCTCCGGGACATT  | 99.45     | T/T      | 1.83     | 15.08   | 0.41    | 32        |
|             |                |      |       |           |                                     |           | T/C      | 26.51    |         |         |           |
|             |                |      |       |           |                                     |           | C/C      | 71.66    |         |         |           |
| rs136457441 | <i>RPL26</i>   | M    | 19    | 28520752  | TGGACTACTTTGCCA[A/G]TTTGTGCCCTTTGT  | 91.82     | G/G      | 22.18    | 48.42   | 0.26    | 48        |
|             |                |      |       |           |                                     |           | G/A      | 52.48    |         |         |           |
|             |                |      |       |           |                                     |           | A/A      | 25.35    |         |         |           |
| rs136746215 | <i>SEC14L1</i> | M    | 19    | 56362555  | CTGCCCACTCGGGG[T/G]GCTGAGGGGCTCGCC  | 72.36     | G/G      | 19.66    | 34.42   | <0.0001 | 38        |
|             |                |      |       |           |                                     |           | GT       | 43.26    |         |         |           |
|             |                |      |       |           |                                     |           | T/T      | 37.08    |         |         |           |

Table S6 (continued).<sup>ab</sup>

| SNP         | Gene symbol     | Type | Chrom | Location  | Alleles and flanking sequence       | Call rate | Genotype |          | MAF (%) | HWE      | Reference |
|-------------|-----------------|------|-------|-----------|-------------------------------------|-----------|----------|----------|---------|----------|-----------|
|             |                 |      |       |           |                                     | (%)       | Genotype | freq (%) |         |          |           |
| rs43321188  | <i>SERPINE2</i> | M    | 2     | 116547485 | GTAGCATCCCCAGGA[T/C]GGACGCAATCCCATG | 97.82     | T/T      | 7.99     | 26.21   | 0.18     | 42        |
|             |                 |      |       |           |                                     |           | T/C      | 36.43    |         |          |           |
|             |                 |      |       |           |                                     |           | C/C      | 55.58    |         |          |           |
| rs110365063 | <i>SLC18A2</i>  | M    | 26    | 38071106  | CTAGAAATCCAGACC[A/G]CCAAGCCCGGGCTCA | 97.82     | A/A      | 2.42     | 15.43   | 0.95     | 39        |
|             |                 |      |       |           |                                     |           | A/G      | 26.02    |         |          |           |
|             |                 |      |       |           |                                     |           | G/G      | 71.56    |         |          |           |
| rs41912290  | <i>SREBF1</i>   | M    | 19    | 35684696  | ACGTGGCCGGAGCTC[T/C]TACCTGCAGCTTCTC | 94.36     | C/C      | 19.85    | 41.71   | 0.02     | 46        |
|             |                 |      |       |           |                                     |           | C/T      | 43.74    |         |          |           |
|             |                 |      |       |           |                                     |           | T/T      | 36.42    |         |          |           |
| rs137182814 | <i>STAT5A</i>   | S    | 19    | 43740886  | CTCAGCCCTGGTGAC[C/G]AGGTGACTCCTGGCC | 97.09     | G/G      | 19.66    | 41.29   | 0.01     | 12        |
|             |                 |      |       |           |                                     |           | G/C      | 43.26    |         |          |           |
|             |                 |      |       |           |                                     |           | C/C      | 37.08    |         |          |           |
| rs42158454  | <i>SYTL2</i>    | M    | 29    | 10194073  | ACCAATCTTAGCAGC[A/T]CCTCTGGCATGACGT | 96.00     | A/A      | 0.00     | 8.33    | 0.04     | 25        |
|             |                 |      |       |           |                                     |           | A/T      | 16.67    |         |          |           |
|             |                 |      |       |           |                                     |           | T/T      | 83.33    |         |          |           |
| rs42525506  | <i>TAF9</i>     | M    | 20    | 10986894  | GCACACCAACCCAC[A/C]AGCCATGCTGTTTC   | 80.00     | A/A      | 9.09     | 46.02   | < 0.0001 | 36        |
|             |                 |      |       |           |                                     |           | A/C      | 73.86    |         |          |           |
|             |                 |      |       |           |                                     |           | C/C      | 17.05    |         |          |           |
| rs110660625 | <i>TBC1D24</i>  | N    | 25    | 2514825   | CGTGGCTGGTGACTG[A/G]CGCTAAAATGCCTCC | 96.18     | A/A      | 12.10    | 33.36   | 0.32     | 32        |
|             |                 |      |       |           |                                     |           | A/G      | 42.53    |         |          |           |
|             |                 |      |       |           |                                     |           | G/G      | 45.37    |         |          |           |
| rs110805802 | <i>TDRKH</i>    | M    | 3     | 20519342  | AGGAAGAGAATTGCT[T/C]ATTCTGCAGAAACCA | 92.91     | T/T      | 1.96     | 12.82   | 0.53     | 33        |
|             |                 |      |       |           |                                     |           | T/C      | 21.72    |         |          |           |
|             |                 |      |       |           |                                     |           | C/C      | 76.32    |         |          |           |
| rs132789482 | <i>TSHB</i>     | M    | 3     | 30778061  | AATATCCAGCACAGA[T/C]GGTGGTGTGATGGT  | 75.45     | T/T      | 2.89     | 14.10   | 0.13     |           |
|             |                 |      |       |           |                                     |           | T/C      | 22.41    |         |          |           |
|             |                 |      |       |           |                                     |           | C/C      | 74.70    |         |          |           |
| rs43445397  | <i>TSPYL1</i>   | M    | 9     | 36151521  | AATGTCGACGCATCC[A/G]CCCGAATTTATGCT  | 99.45     | A/A      | 0.00     | 49.91   | < 0.0001 | 25        |
|             |                 |      |       |           |                                     |           | A/G      | 99.82    |         |          |           |
|             |                 |      |       |           |                                     |           | G/G      | 0.18     |         |          |           |

Table S6 (continued).<sup>ab</sup>

| SNP         | Gene symbol   | Type | Chrom | Location | Alleles and flanking sequence          | Call rate | Genotype |          | MAF (%) | HWE     | Reference |
|-------------|---------------|------|-------|----------|----------------------------------------|-----------|----------|----------|---------|---------|-----------|
|             |               |      |       |          |                                        | (%)       | Genotype | freq (%) |         |         |           |
| rs135236119 | <i>TLL3</i>   | M    | 22    | 17320731 | TGCGGTCCAGT CGCC[A/G]GT CGAT GACCACACG | 95.64     | A/A      | 6.46     | 23.67   | 0.27    | 32        |
|             |               |      |       |          |                                        |           | A/G      | 34.41    |         |         |           |
|             |               |      |       |          |                                        |           | G/G      | 59.13    |         |         |           |
| rs134031231 | <i>TXN2</i>   | M    | 5     | 80313306 | TGTACTGTGGGGTCT[T/G]CAGGGCCCTGGAGGC    | 96.36     | G/G      | 18.30    | 43.02   | 0.85    | 35        |
|             |               |      |       |          |                                        |           | GT       | 49.43    |         |         |           |
|             |               |      |       |          |                                        |           | T/T      | 32.26    |         |         |           |
| rs134818016 | <i>UHRF1</i>  | F    | 7     | 17836918 | CTGCGAGGACGATGT[-/G]GGCCGACGCCATCTT    | 85.64     | G/G      | 2.76     | 8.28    | <0.0001 | 34        |
|             |               |      |       |          |                                        |           | G/-      | 11.04    |         |         |           |
|             |               |      |       |          |                                        |           | -/-      | 86.20    |         |         |           |
| rs137248155 | <i>VCAN</i>   | M    | 7     | 84362267 | TCACAGAGAAAATC[T/C]TGAACCTTGATCATCT    | 97.82     | T/T      | 9.11     | 28.72   | 0.33    | 42        |
|             |               |      |       |          |                                        |           | T/C      | 39.22    |         |         |           |
|             |               |      |       |          |                                        |           | C/C      | 51.67    |         |         |           |
| rs134282928 | <i>WBP1</i>   | M    | 11    | 10478345 | TCGAGGGGCAGCCAG[T/G]GGCTGCAGTGT AAGG   | 91.45     | G/G      | 0.60     | 13.52   | 0.02    | 38        |
|             |               |      |       |          |                                        |           | GT       | 25.84    |         |         |           |
|             |               |      |       |          |                                        |           | T/T      | 73.56    |         |         |           |
| rs43332935  | <i>WDR77</i>  | M    | 3     | 34445120 | AGTGCAGGCTGTGCC[C/G]TCAGCTCTGTTGTGC    | 99.09     | G/G      | 0.92     | 10.64   | 0.60    | 44        |
|             |               |      |       |          |                                        |           | G/C      | 19.45    |         |         |           |
|             |               |      |       |          |                                        |           | C/C      | 79.63    |         |         |           |
| rs43662395  | <i>ZNF638</i> | M    | 11    | 13766506 | TCAATCATGGTTTTT[C/A/G]GATTTTCTTCCATAA  | 91.82     | A/A      | 0.59     | 5.64    | 0.24    | 31        |
|             |               |      |       |          |                                        |           | A/G      | 10.10    |         |         |           |
|             |               |      |       |          |                                        |           | G/G      | 89.31    |         |         |           |
| rs110883602 | <i>ZP2</i>    | M    | 25    | 20183725 | GGTTTTGTTGATGG[T/C]GGTAGACCTCGACGT     | 74.91     | C/C      | 20.15    | 39.44   | <0.0001 | 37        |
|             |               |      |       |          |                                        |           | CT       | 38.59    |         |         |           |
|             |               |      |       |          |                                        |           | T/T      | 41.26    |         |         |           |

<sup>a</sup>Single nucleotide polymorphism represented as the rs number designated by the National Center for Biotechnology Information dbSNP. For entries not beginning with rs, the abbreviation given by previous researchers was used. <sup>b</sup>Abbreviations are: SNP, single nucleotide polymorphism; Type, type of polymorphism; F, frameshift; I, intron; N, nonsense; M, missense; P, promoter; S, synonymous; Chrom, chromosome in which SNP was located; Location, location within the chromosome which the SNP was located; Genotype freq, genotype frequency; MAF, minor allele frequency; HWE, probability of SNP being in Hardy Weinberg Equilibrium; Reference, reference from which the gene was obtained (SNPs without references were chosen due to having a well-known role in reproductive processes).
